# Supplementary material
Source: Copernicus journal article supplement (doi:10.5194/egusphere-2026-3834)
Supplement: Supplementary file 1 [file egusphere-2026-3834-supplement.pdf]

## Supplementary data

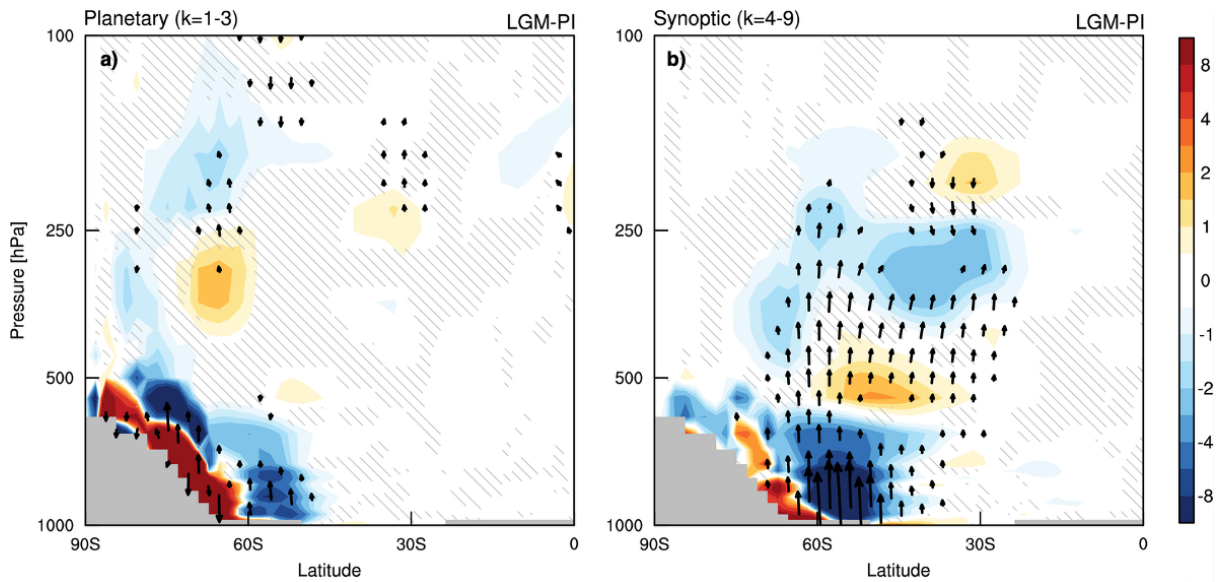

**Figure S1.** Same as in Figure 7c, but decomposed into zonal wavenumber ( $k$ ) components to distinguish the contributions of different spatial scales. Panels show the difference between the LGM and PI simulations (LGM minus PI) for **(a)** planetary scale ( $k = 1-3$ ) and **(b)** synoptic scale ( $k = 4-9$ ). Hatching indicates regions where the differences are not statistically significant at the 99% confidence level based on a Student's  $t$ -test.

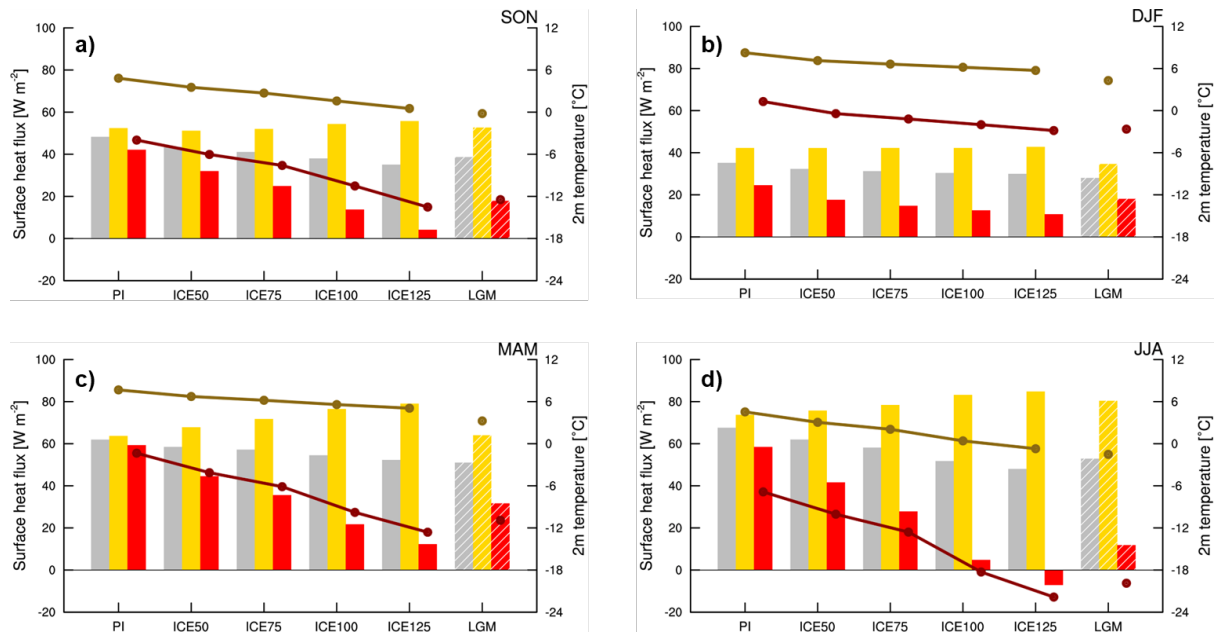

**Figure S2.** Seasonal variations of surface boundary conditions for the four austral seasons: **(a)** spring (SON), **(b)** summer (DJF), **(c)** autumn (MAM), and **(d)** winter (JJA). The plots show surface upward heat flux (bars;  $\text{W m}^{-2}$ ) and 2-meter temperature (lines;  $^{\circ}\text{C}$ ) averaged

over two key analysis regions: Area 1 (45°S–55°S, open ocean zone) and Area 2 (55°S–65°S, sea ice zone). Yellow and red colors correspond to Area 1 and Area 2, respectively, while gray bars show the average over the combined region. Hatched bars indicate the LGM experiment
